# Supplementary material
Source: PubMed Central journal article supplement (PMC5576936)
Supplement: ASN.2016111208SupplementaryData.pdf [file ASN.2016111208SupplementaryData.pdf]

## SUPPORTING INFORMATION

Supporting Information Table 1. Body weight, kidney weight and systolic blood pressure (SBP) in JAK2<sup>Ctrl</sup> and JAK2<sup>podKO</sup> mice.

|                       | Body weight (g) | Kidney weight (g) | Kidney weight: body weight (%) | SBP (mmHg) |
|-----------------------|-----------------|-------------------|--------------------------------|------------|
| JAK2 <sup>Ctrl</sup>  | 23.5±0.4        | 0.19±0.01         | 0.82±0.03                      | 89±2       |
| JAK2 <sup>podKO</sup> | 23.7±0.4        | 0.18±0.01         | 0.79±0.02                      | 88±3       |

**Supporting Information Table 2. Relative mRNA levels of genes involved in the fusion of autophagosomes with lysosomes.**

|                                                         | Scramble (AU) | JAK2 siRNA (AU)        |
|---------------------------------------------------------|---------------|------------------------|
| ATP6AP2                                                 | 1.00±0.04     | 1.05±0.02              |
| Autophagy related 14                                    | 1.00±0.05     | 1.08±0.05              |
| Caveolin-1                                              | 1.00±0.02     | 0.96±0.01              |
| CD38                                                    | 1.00±0.05     | 1.06±0.10              |
| DNA damage regulated autophagy modulator 1              | 1.02±0.10     | 0.91±0.10              |
| FAM176A                                                 | 1.09±0.07     | 0.95±0.04              |
| Histone deacetylase 6                                   | 1.01±0.07     | 1.22±0.04*             |
| Huntingtin-associated protein 1                         | 1.00±0.03     | 1.19±0.07*             |
| Niemann-Pick C1                                         | 1.00±0.02     | 1.08±0.03              |
| Pleckstrin homology domain-containing family M member 1 | 1.01±0.06     | 1.02±0.05              |
| SNAP-associated protein                                 | 1.00±0.05     | 1.12±0.01              |
| Sorting nexin 14                                        | 1.00±0.04     | 1.13±0.02*             |
| Syntaxin 17                                             | 1.00±0.05     | 1.06±0.01              |
| Tectonin $\beta$ -propeller repeat containing 1         | 1.01±0.08     | 1.01±0.04              |
| Vesicle-associated membrane protein 7                   | 1.00±0.05     | 1.11±0.06              |
| Vesicle-associated membrane protein 8                   | 1.00±0.02     | 1.15±0.03 <sup>†</sup> |

Values normalized to RPL13a. AU = arbitrary units. \*p<0.05, <sup>†</sup>p<0.01.

**Supporting Information Table 3. Primer sequences used in the study.**

|                                                                   | <b>Sequences (5'→ 3')</b> |
|-------------------------------------------------------------------|---------------------------|
| Forward $\alpha$ -galactosidase                                   | TGGGATCAAACACCTCGCAA      |
| Reverse $\alpha$ -galactosidase                                   | CCAGTCAGCAAATGTCTGCG      |
| Forward ATP6AP2                                                   | TCTCTCCGAACTGCAAGTGCAACA  |
| Reverse ATP6AP2                                                   | CCAAACCTGCCAGCTCCAATGAAT  |
| Forward ATPase H <sup>+</sup> transporting accessory protein 1    | TACACCGCAGCTCTTACTGC      |
| Reverse ATPase H <sup>+</sup> transporting accessory protein 1    | AGGAGATGCCACCTGAGTCT      |
| Forward ATPase H <sup>+</sup> transporting lysosomal V0 subunit C | TGCTGGTATTTAGAGCGCAG      |
| Reverse ATPase H <sup>+</sup> transporting lysosomal V0 subunit C | GCCTCATGACTGACATGGCT      |
| Forward Autophagy related 14                                      | GTGGCGAAAACCTCAGCAAG      |
| Reverse Autophagy related 14                                      | GAACCAAGAGGTCACCGAGG      |
| Forward Beclin 1                                                  | AGGCATGGAGGGGTCTAAGG      |
| Reverse Beclin 1                                                  | GCCTGGGCTGTGGTAAGTAAT     |
| Forward Cathepsin B                                               | ATGTGGTGGTCCTTGATCCTT     |
| Reverse Cathepsin B                                               | CTTCCTGGCAGTTTGGGTCC      |
| Forward Cathepsin D                                               | CTATAAGCCGGCGACCTCTG      |
| Reverse Cathepsin D                                               | TGAACTTGCGCAGAGGGATT      |
| Forward Caveolin-1                                                | AAAAGTTGTAGCGCCAGGCT      |
| Reverse Caveolin-1                                                | GACCACGTCGTCGTTGAGAT      |
| Forward CD38                                                      | GATGCTCAATGGGTCCCTCC      |
| Reverse CD38                                                      | GGAAGCTCCTTCGATGTCGT      |
| Forward Cystinosin                                                | CAAGTCCTGGGGGCTTAGAG      |
| Reverse Cystinosin                                                | GGCTGGGTAGGCATCTTGAA      |

|                                                                 |                          |
|-----------------------------------------------------------------|--------------------------|
| Forward DNA damage regulated autophagy modulator 1              | GCTTCTTGGTCCGACGAG       |
| Reverse DNA damage regulated autophagy modulator 1              | AGTGTCGTTGGTGCTATCCA     |
| Forward FAM176A                                                 | GAAGTACGCGCCAGTCGT       |
| Reverse FAM176A                                                 | TCAGCACCTTTCCAAGGC       |
| Forward Histone deacetylase 6                                   | AGCCTGGTTAAACGGTAGGC     |
| Reverse Histone deacetylase 6                                   | AAGGCTCTCTAATCTGCGCC     |
| Forward Huntingtin-associated protein 1                         | TCCCTCTGAGGAGCTGTCTG     |
| Reverse Huntingtin-associated protein 1                         | GGGGCATCAGAACGACTGAA     |
| Forward Lysosomal $\alpha$ -glucosidase                         | AGCGAGTTCCTGCTTTGGAG     |
| Reverse Lysosomal $\alpha$ -glucosidase                         | CCGAAGCATGAGATGACCCA     |
| Forward Mucopilin-1                                             | GGCGCCTATGACACCATCAA     |
| Reverse Mucopilin-1                                             | CAGTTCACCAGCAGCGAATG     |
| Forward Niemann-Pick C1                                         | CCTACCCACATGCTGTCTC      |
| Reverse Niemann-Pick C1                                         | CTGTCTTCCCGGGCCATAAC     |
| Forward Nuclear receptor binding factor-2                       | TGTCGCTCTTGGGCTCTCA      |
| Reverse Nuclear receptor binding factor-2                       | CCAGCAGCTAACAAACGGTC     |
| Forward Pleckstrin homology domain-containing family M member 1 | TCGAAGTCCAACACTCAGGC     |
| Reverse Pleckstrin homology domain-containing family M member 1 | CTCAAAGTGCAGGTGTGTGC     |
| Forward Ras-related GTP binding C                               | AAGTTTTTGTGCGGCATCGG     |
| Reverse Ras-related GTP binding C                               | GGTCATGATCAGGCGAGGAG     |
| Forward Ribosomal protein large p0                              | GCGTCCTGGCATTGTCTGT      |
| Reverse Ribosomal protein large p0                              | GAAGGCCTTGACCTTTTCAGTAAG |
| Forward Ribosomal protein L13a                                  | GCTCTCAAGGTTGTTCCGGCTGA  |
| Reverse Ribosomal protein L13a                                  | AGATCTGCTTCTTCTTCCGATA   |
| Forward Serine/threonine kinase 4                               | TGTGTGGCAGACATCTGGTC     |

|                                                         |                        |
|---------------------------------------------------------|------------------------|
| Reverse Serine/threonine kinase 4                       | ACAAACGGGTGCTGTAGGAG   |
| Forward SNAP-associated protein                         | GCTACAGAACTGTGCCGGAT   |
| Reverse SNAP-associated protein                         | AACCGCCTTAGTCGTTCCCTG  |
| Forward Sorting nexin 14                                | CCAAATTCAACAGAAGCACACA |
| Reverse Sorting nexin 14                                | TGTCCAAGTCTCGTCTGTC    |
| Forward Syntaxin 17                                     | CTAGGCGGGAGGTGTTTCTG   |
| Reverse Syntaxin 17                                     | AGCCTGCGTAACTTCACCTT   |
| Forward Tectonin $\beta$ -propeller repeat containing 1 | GAATTTTGGAGGGGAGCCCA   |
| Reverse Tectonin $\beta$ -propeller repeat containing 1 | TGGCTGACATCCTCTCGGTA   |
| Forward Transcription factor EB                         | CTCTTGCAGAAGACCCCTCT   |
| Reverse Transcription factor EB                         | AGGGTGGTGGGATAGTGCAA   |
| Forward Transcription factor EB promoter                | GCTACACCCCAGGAAACGTC   |
| Reverse Transcription factor EB promoter                | TTGTTTTGGTGAGTCCCGCA   |
| Forward Vacuolar protein sorting-associated protein 18  | TGGGCGAGGTTGTGATTACC   |
| Reverse Vacuolar protein sorting-associated protein 18  | AAGGACGAGACGATCGAGGA   |
| Forward Vesicle-associated membrane protein 7           | CAGACGGTACTCGGTCAGATT  |
| Reverse Vesicle-associated membrane protein 7           | CTTAGCCAGAATCTGCTCTGTC |
| Forward Vesicle-associated membrane protein 8           | AACCTGCAGTTACGTGTGTG   |
| Reverse Vesicle-associated membrane protein 8           | TGTTTCAGACGTGGCTTCCAA  |

---

## **SUPPORTING INFORMATION FIGURE LEGENDS**

**SUPPORTING INFORMATION FIGURE 1.** Urine albumin excretion in Podocin-*cre*<sup>-</sup> and Podocin-*cre*<sup>+</sup> mice aged six months.

**SUPPORTING INFORMATION FIGURE 2.** Representative periodic acid-Schiff (a and b, original magnification x 400) and hematoxylin and eosin (c and d, original magnification x 100) stained kidney sections from JAK2<sup>Ctrl</sup> (a and c) and JAK2<sup>podKO</sup> mice (b and d) aged 10 weeks.

**SUPPORTING INFORMATION FIGURE 3.** Representative flow cytometry histograms from primary cultured cells stained for nephrin.

**SUPPORTING INFORMATION FIGURE 4.** Putative binding sites for STAT1 within the mouse TFEB promoter.

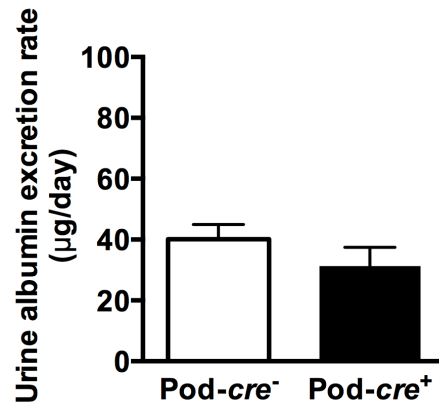

Supporting Information Figure 1.

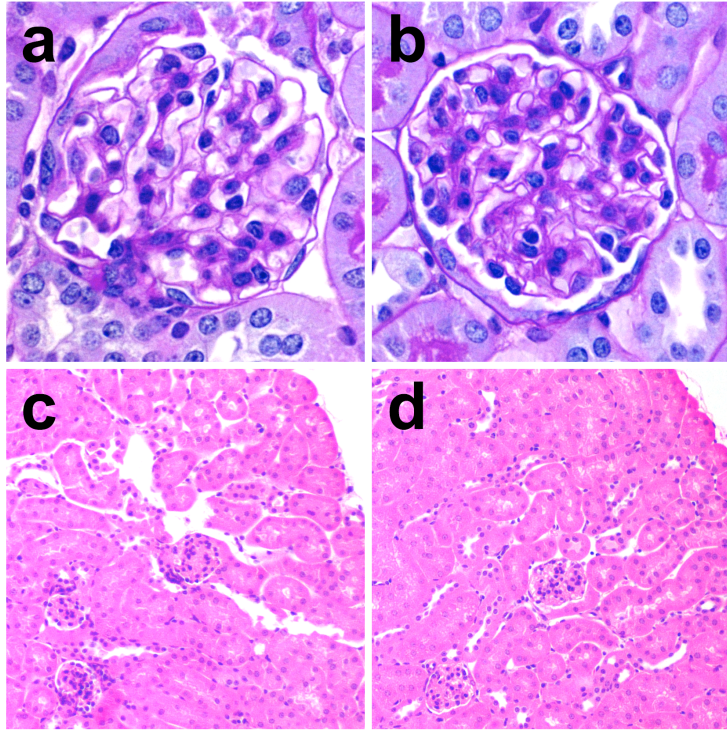

**Supporting Information Figure 2.**



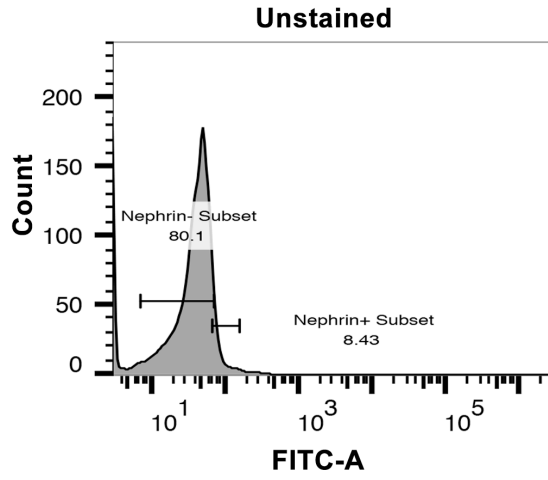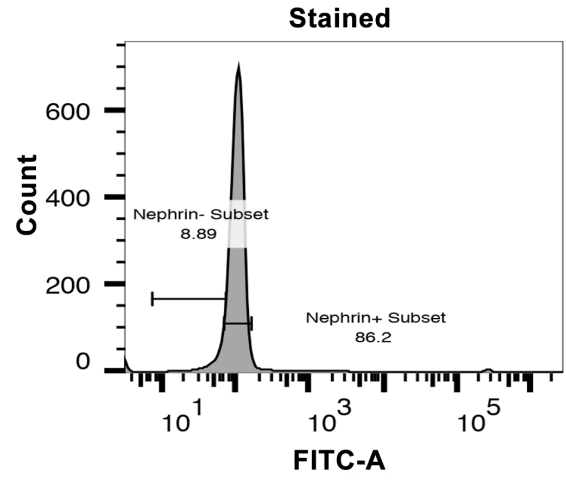

Supporting Information Figure 3.

```

>chromosome:GRCm38:17:47735530:47793019:1
-1500 TATCCTAGTGCCGGGAGCTTCCAGCAGGAGGGACAGGCATGGCAGAAGACTAGTAATTCT
-1440 GAGCAGTACAATGTAGGTGCTGACGCTGGTCCAACCTCTCTCACACTTAGGGGCAGGGAC
-1380 AAAAGGGCAAGATCCAGGTCATGTACCACATTCCAAACGGAGACAGGATATATCGTGAAA
-1320 ACGGTGGGCTCTTGAGCAAGGGGTTTTACATCTCACACCTGCCGGATGAAACCAAAAATC
-1260 ATGCTCCGAGCACAGTGGCCGTTTCCCACCAAGCAGGCAAACCTGCAGAGGGCATTTCATT
      85%
-1200 CCATCAGGAGTGTCTGAATAACAAAACAAGTCAGGAGCAGCGGCACACACCTCCGACTCC
-1140 AGCCTTCTTCGGAAAGCAGAGGCAGGCAGAGCTCCGTCAGATTGAGGGCACTATAATCAAC
      96%
-1080 TAATGAATTC TAGGCCACCTAGGTTATTGGGTGAGTCTGTCTCCACGAAACAAAGCAAT
-1020 GGTAGAAATAACAATAAACAGGTTTTAAGGCCAAGCACGTGAACCC TGGAGTGTGGCTT
-960 CAGTGCTCTCGCAGACCTTGCCTGGAAATCTCACAAAGAGAACTGTTTTGATTACAGTTA
      94%
-900 AGATATCCTGCCTTCCTTTATAACCTTTTACCTAATCAATTACAACAGTATCTGCTACAC
-840 CCCAGGAAACGTCCCGTATCTTATTTAAATTTCTCAGCAGTCCTTTGAAAGATAACTGCG
      88%
-780 GGACTCACCAAAAACAAAAGTATGGCTATGGTAAAAGACAAGGAGAAGCCCTTGCCAGTT
-720 TCTCTGTCAACTTCTCTTAATCCCTATGTTTTAAATCTACATTA AAAAAAAAAATATATAT
-660 ATATATATATATATTTAAACCAGGCAGTAGTGGTATACACTTTTAATCC CAGCACTTGAA
-600 AGACAGGTGGATCTCTGTGAATTTAAGGCCAGACTGTCTACAAATCTAGTTGTAGAACAG
-540 CCAAGGCTACACAAAGAAACCTTGTGTTAAAGAACCATATATATATACTTACATAAATAT
-480 ATATTTAATAAACTAAAGCTCTGCTTCATACTGGCTTGCTCTGAAATTATAATAAATAT
-420 AATAGAGCAACAACAATAATATTGTTATTATTATTTAACAAAGAAATCAAAACTCTCCCC
-360 AAGTGGAAAGTTGCTAAGGGATAGGGTAACTTCTCAGGTTGCTGCTGGCAATTATGGGGGT
-300 GGGATCCTATATTTTTCTCACACTTCTTGAAAAAGCAGCTTGCTATTGGTCCTTTTCAA
      88%
-240 GATGTAATAATATAGAAAGTCATATCACGGGCCATCATTGACAGAAAAAAGAGAGAAAA
-180 TCTGAAAAGGAATAAAGACAAACGTTTTAAAGTTAAAAATTGACTCCTAGGGAACAGCGG
-120 CCAGTAGAATGGAAGTGC AAATCCCGGCAGCCCTTCGCGGCTGCGACGGGGACTACATT
-60 PCCCAGCGGGCACAGCGGTAGGCCTATGGGGGGCGTCCG CAGGAGGGGCGGGTGTGCC
      94%

```

**Supporting Information Figure 4.**
